# Supplementary material
Source: PubMed Central journal article supplement (PMC2731717)
Supplement: NIHMS126797-supplement-1.pdf [file NIHMS126797-supplement-1.pdf]

## Supplement Material

### Online Figure I

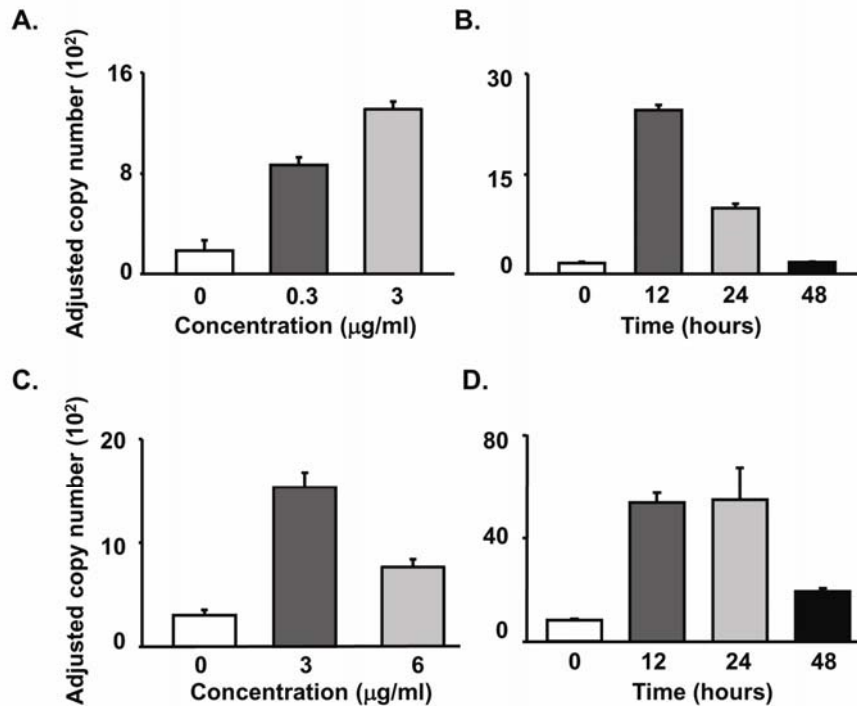

**Online Figure I. Time kinetics and dose dependence of TLR4 and TLR5 stimulation of human macrovessels.** Human temporal arteries from 3 donors were incubated with LPS at different concentrations (0, 0.3, 3 μg/ml) for 14 h (A) or at 3 μg/ml for 12, 24, or 48 h (B). Human temporal arteries were incubated with flagellin for 14 h at different concentrations (0, 3 or 6 μg/ml) (C) or at 3 μg/ml for 12, 24, or 48 h (D). CD83 gene expression was quantified by real-time PCR. Data are from three independent experiments and presented as mean ± SEM.

## Online Figure II

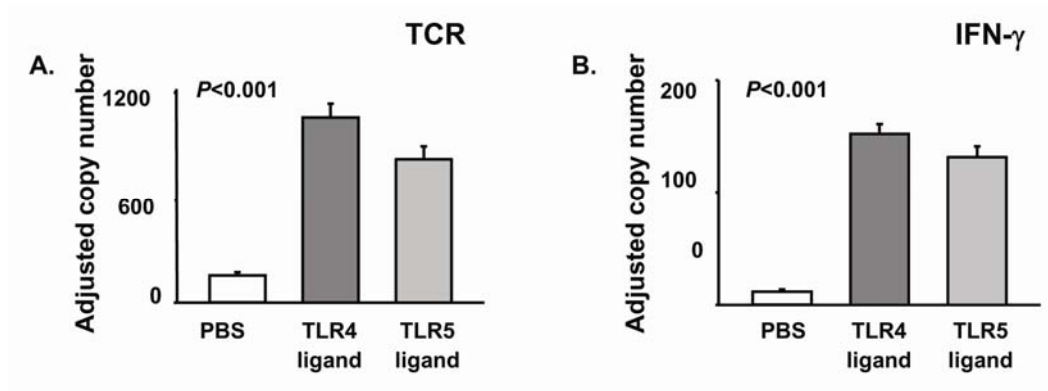

**Online Figure II. Efficiency of TLR4 and TLR5 agonists to facilitate T-cell recruitment and activation.** Human temporal artery-SCID chimeras were treated with saline, LPS, or flagellin as described in Fig. 2. Purified human CD4 T cells were adoptively transferred one day later. Human artery grafts were retrieved 7 days later, and RNA was isolated. Gene expression of T-cell receptors (**A**) or IFN- $\gamma$  (**B**) in the grafts was quantified by real-time PCR with human-specific primers. Data are from three independent experiments and presented as mean  $\pm$  SEM.

### Online Figure III

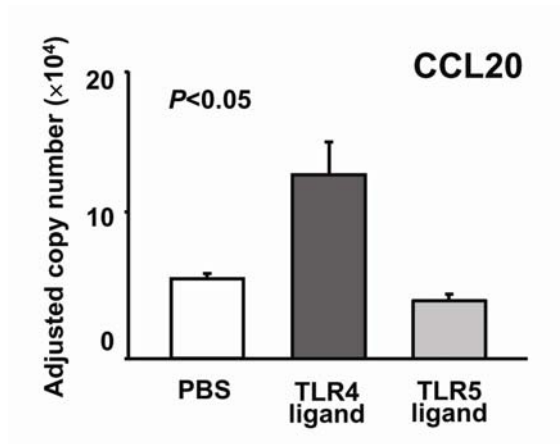

**Online Figure III. TLR4 agonists preferentially induce production of the chemokine CCL20 in vivo.** Human temporal arteries were engrafted into SCID mice and injected with PBS, TLR4 ligands (LPS), or TLR5 ligands (flagellin) as described in Fig. 2. Human CD4 T cells were isolated and injected into the chimeras one day later. Artery grafts were retrieved after 7 days and processed for RNA isolation. Expression of transcripts specific for the chemokine CCL20 was analyzed by qRT-PCR. Data are from three independent experiments and presented as mean  $\pm$  SEM.

**Online Table I. Human-specific primer pairs for mRNA quantification**

| Gene           | Sense                         | Anti-sense                    |
|----------------|-------------------------------|-------------------------------|
| TLR4           | 5-CTGCAATGGATCAAGGACCA-3      | 5-TTATCTGAAGGTGTTGCACATTCC-3  |
| TLR5           | 5-TGCCTTGAAGCCTTCAGTTATG-3    | 5-CCAACCACCACCATGATGAG-3      |
| CD83           | 5-GTTATTGGAGGGTGGTGAAGAGAGG-3 | 5-GTGAGGAGTCACTAGCCCTAAATGC-3 |
| CD11c          | 5-ACTTACTTACCCTCACCTGTCAGG-3  | 5-AGGTAGAAATTGCAAGTCAAGTCC-3  |
| CD11b          | 5-CACATGACTTTCGGCGGATGA-3     | 5-GCTGCGTTATTGGCTTCACC-3      |
| CD209          | 5-TGCAGTCTTCCAGAAGTAACCGCT-3  | 5-TGTTGGGCTCTCCTCTGTTCCAAT-3  |
| CCL20          | 5-GCGCAAATCCAAAACAGAC-3       | 5-AACCTCCAACCCAGCA-3          |
| CCR6           | 5-GGCGACTAAGTCATTCCG-3        | 5-CTCCGAGACAGTCTGGTAC-3       |
| TCR            | 5-CCTTCAACAACAGCATTATCCAG-3   | 5-CGAGGGAGCACAGGCTGTCTTA-3    |
| IFN- $\gamma$  | 5-ACCTTAAGAAATATTTAATGC-3     | 5-ACCGAATAATTAGTCAGCTT-3      |
| Smoothelin     | 5-TTGGACAAGATGCTGGATCA-3      | 5-CGCTGGTCTCTTCTTCTTG-3       |
| $\beta$ -actin | 5-ATGGCCACGGCTGCTTCCAGC-3     | 5-CATGGTGGTGCCGCCAGACAG-3     |

**Online Table II. Responsiveness of human tissues to different TLR agonists**

|  | Ligand     | ( $\mu\text{g/ml}$ ) | CD83 expression (fold induction) |      |
|--|------------|----------------------|----------------------------------|------|
|  |            |                      | Lymph node                       | Skin |
|  | LTA        | 500                  | 12                               | N/A  |
|  | Poly (I:C) | 100                  | 11                               | 2.7  |
|  | LPS        | 3                    | 3.5                              | 42   |
|  | Flagellin  | 3                    | 398                              | 1.0  |
|  | CpG        | 50                   | 5                                | 1.3  |
